# Supplementary material
Source: PubMed Central journal article supplement (PMC2552399)
Supplement: NIHMS65276-supplement-Supporting_Inf.pdf [file NIHMS65276-supplement-Supporting_Inf.pdf]

# Synthesis and Properties of Oxygen-Centered Tetradecaimido Hexatantalum Clusters

Jamin L. Krinsky, Laura L. Anderson, John Arnold\* and Robert G. Bergman\*

*Department of Chemistry, University of California, Berkeley, California, 94720*

## Supporting Information

### Table of Contents

|                                                               |      |
|---------------------------------------------------------------|------|
| I. Experimental Details -----                                 | S-1  |
| II. X-Ray Crystallography -----                               | S-3  |
| III. Computational Methods -----                              | S-3  |
| IV. Electrospray Mass Spectra for <b>3</b> and <b>4</b> ----- | S-9  |
| V. References -----                                           | S-13 |

### I. Additional Experimental Details

**General.** All manipulations were performed using standard Schlenk-line techniques or an N<sub>2</sub>-atmosphere glovebox. Reactions followed by NMR spectroscopy were performed in 5 mm Pyrex NMR tubes which were flame-sealed under reduced pressure. Solvents were dried by passage through a column of activated alumina,<sup>[1]</sup> degassed with nitrogen and stored over 4 Å molecular sieves. Solvents were tested with Na/benzophenone prior to use. Deuterated solvents were vacuum-transferred from Na/benzophenone and stored in Teflon-sealed Kontes vessels inside a glovebox. NMR spectra were obtained with Bruker a DRX-500 spectrometer. Chemical shifts were calibrated relative to residual solvent peaks and are reported relative to TMS. UV-visible absorption spectra were recorded in THF on a Hewlett Packard 8453 spectrophotometer using a 2 mm path-length cell. Elemental analyses were performed at the UC, Berkeley Microanalytical Facility with a Perkin Elmer 2400 Series II CHNO/S Analyzer. Electrospray mass spectrometry was performed by Dr. John Greaves (using THF as the matrix) at the UC, Irvine Mass Spectrometry Facility. All starting

materials obtained from commercial sources were used without further purification, except *t*BuNH<sub>2</sub>, pyridine, aniline and *m*-chloroaniline which were distilled prior to use. [Bn<sub>3</sub>Ta=N-*t*Bu] was prepared as previously reported.<sup>[2]</sup> Isotopically-enriched water (30% <sup>17</sup>O, 50% <sup>18</sup>O) was purchased from Isotec and degassed prior to use.

**General procedure for preparation of (ArN)<sub>14</sub>Ta<sub>6</sub>O.** Compound **1** (100 mg, 0.190 mmol, 1 equiv) was dissolved in 1 mL of benzene. The aniline (0.950 mmol, 5 equiv) was treated with 0.6 μL (0.03 mmol, 0.16 equiv) of degassed water via microsyringe and then dissolved in 0.5 mL benzene. The two solutions were mixed, and the reaction mixture was transferred to a Kontes reaction vessel. Hexane (4 mL) was then added, causing the formation of a yellow precipitate. The vessel was sealed with a Teflon valve and immersed in a 135 °C oil bath. After a few minutes, most of the yellow solid had dissolved and the solution had developed a red color. After heating for ca. 24 h the reaction vessel was allowed to cool and was transferred to a glove box. The supernatant was removed and the crystalline product was washed with Et<sub>2</sub>O (2 x 2 mL) then pentane (2 x 2 mL). Isotopically-enriched samples were prepared in an identical fashion using <sup>17</sup>O/<sup>18</sup>O enriched water.

**Reaction conditions from which crystals of 5 were obtained.** Compound **1** (10.0 mg, 0.019 mmol, 1 equiv) was dissolved in 0.6 mL of C<sub>6</sub>D<sub>6</sub>, and the solution was added to 13.5 mg (0.106 mmol, 5.56 equiv) of *m*-chloroaniline. The reaction mixture was then transferred to an NMR tube that contained trace tantalum oxide from previous experiments. The NMR tube was flame sealed under reduced pressure and heated at 135 °C in an oil bath for 24 h. The reaction mixture was then allowed to stand at ambient temperature for ca. three weeks during which time red/orange crystals of **5** formed.

**General procedure for reactivity studies.** Compound **3** (5 mg, 0.002 mmol) was dissolved in 0.6 mL of C<sub>6</sub>D<sub>6</sub> and the appropriate reagent was added via microsyringe. The reaction mixture was then transferred to an NMR tube and flame sealed under reduced pressure. The tube was then heated at 135 °C in an oil bath and the reaction was periodically monitored by NMR.

## II. X-Ray Crystallography

**General Procedures.** A crystal of appropriate size was mounted on a Kapton<sup>®</sup> loop using Paratone-N hydrocarbon oil. The crystal was transferred to a diffractometer/CCD area detector, centered in the beam, and cooled by a nitrogen flow low-temperature apparatus that had been previously calibrated by a thermocouple placed at the same position as the crystal. An arbitrary hemisphere of data was collected and the raw data were integrated using SAINT.<sup>[3]</sup> Cell dimensions reported were calculated from all reflections with  $I > 10 \sigma$ . The data were corrected for Lorentz and polarization effects, but no correction for crystal decay was applied. Data were analyzed for agreement and possible absorption using XPREP.<sup>[4]</sup> An empirical absorption correction based on comparison of redundant and equivalent reflections was applied using SADABS.<sup>[5]</sup> The structure was solved via direct methods, expanded using Fourier techniques, and refined on  $F^2$  with the SHELXTL-97 suite of programs.<sup>[6]</sup> ORTEP diagrams were created using the ORTEP-3 software package<sup>[7]</sup> and rendered using the POV-ray graphics program.<sup>[8]</sup>

## III. Computational Methods

Molecular orbital calculations on **2** were performed using the Jaguar 6.5 package<sup>[9]</sup> with Maestro 7.5 as the graphical user interface<sup>[10]</sup> at the UC, Berkeley Molecular Graphics Facility. The initial

atomic coordinates were taken from the X-ray structural data. The hybrid DFT functional X3LYP<sup>[11]</sup> was used throughout, which consists of the Becke three-parameter functional<sup>[12]</sup> and the correlation functional of Lee, Yang and Par.<sup>[13]</sup> It also includes the Perdew-Wang 1991 gradient exchange functional<sup>[14]</sup> and the exchange has been parameterized to fit the Gaussian exchange density. We found that for this system the X3LYP functional gives results comparable to the well known B3LYP<sup>[15]</sup> but at slightly less computational cost. The LACVP\* basis set was employed, which uses an effective core potential and valence double- $\zeta$  contraction basis functions for metals.<sup>[16]</sup> The remaining atoms were treated with Pople's 6-31G\* basis set, which includes a set of d polarization functions for non-hydrogen atoms.<sup>[17]</sup> Single point energy calculations starting with the neutral cluster produced excited-state electronic configurations. Thus, the wavefunction was obtained by first calculating that of the dication using a level shift of 0.5 a.u. This wavefunction was then used as an initial guess for optimization of the neutral structure (level shift constraint removed). Vibrational frequency calculations performed on the resulting structure (same level of theory) confirmed that it was a true energetic minimum. Graphical representations of MOs were generated in and exported from Maestro.

### Coordinates (Å) for $C_i$ -Optimized 2.

| atom | x             | y             | z             |
|------|---------------|---------------|---------------|
| Ta1  | 1.2792696352  | -0.9206652122 | 1.5736753355  |
| Ta2  | 0.2060455097  | 1.9833567331  | 0.9806115666  |
| Ta3  | -1.8088255836 | -0.4273567693 | 1.2170053725  |
| N4   | -0.2040941221 | 0.3947175746  | 2.4764755010  |
| N5   | 2.1754757491  | 0.9094017597  | 0.9059241824  |
| N6   | 2.2907007824  | -1.7218594681 | 2.8117794926  |
| N7   | 0.4349557612  | 3.5725637237  | 1.7644629300  |
| N8   | 0.5451980369  | 2.1728011567  | -1.1670576029 |
| N9   | -1.8508676926 | 1.6652733032  | 0.4382430588  |
| N10  | -3.2941999681 | -0.7575413702 | 2.1549412685  |
| O11  | 0.0000000000  | 0.0000000000  | 0.0000000000  |

|     |               |               |               |
|-----|---------------|---------------|---------------|
| C12 | -0.3062871444 | 0.7738951731  | 3.8509594451  |
| C13 | 0.7982117100  | 0.6975878133  | 4.7146509825  |
| H14 | 1.7487380385  | 0.3329557894  | 4.3380206048  |
| C15 | 0.6861467758  | 1.0856675521  | 6.0489282211  |
| H16 | 1.5565348238  | 1.0105929950  | 6.6964596374  |
| C17 | -0.5230054332 | 1.5674451770  | 6.5513229655  |
| H18 | -0.6061463528 | 1.8692141749  | 7.5919932134  |
| C19 | -1.6216129163 | 1.6626984342  | 5.6962225772  |
| H20 | -2.5705871049 | 2.0455939134  | 6.0638198440  |
| C21 | -1.5163698765 | 1.2737750666  | 4.3625989213  |
| H22 | -2.3787306584 | 1.3578790516  | 3.7077467258  |
| C23 | 3.3839518773  | 1.5489229644  | 1.3310008455  |
| C24 | 4.3019630879  | 0.9132659800  | 2.1815829369  |
| H25 | 4.0988800787  | -0.0929828892 | 2.5309936314  |
| C26 | 5.4657948124  | 1.5674003389  | 2.5856698607  |
| H27 | 6.1593325682  | 1.0528327128  | 3.2466535929  |
| C28 | 5.7402394683  | 2.8654008537  | 2.1567583228  |
| H29 | 6.6460959722  | 3.3727311947  | 2.4778794453  |
| C30 | 4.8338990441  | 3.5045216495  | 1.3094739761  |
| H31 | 5.0262588954  | 4.5170890200  | 0.9635752055  |
| C32 | 3.6726100149  | 2.8559801355  | 0.8989428824  |
| H33 | 2.9783068384  | 3.3690053734  | 0.2399955124  |
| C34 | 3.0569554648  | -2.3803015742 | 3.7516277150  |
| C35 | 4.2951920193  | -2.9444952228 | 3.3910477652  |
| H36 | 4.6282923767  | -2.8686315786 | 2.3596113537  |
| C37 | 5.0700778343  | -3.5951596980 | 4.3472031878  |
| H38 | 6.0246605740  | -4.0275181075 | 4.0564825047  |
| C39 | 4.6311908977  | -3.6947605645 | 5.6685268003  |
| H40 | 5.2411757176  | -4.2031751518 | 6.4107669471  |
| C41 | 3.4021638230  | -3.1391745765 | 6.0298891889  |
| H42 | 3.0510158658  | -3.2145534868 | 7.0562429247  |
| C43 | 2.6168210874  | -2.4863278021 | 5.0845978931  |
| H44 | 1.6605423803  | -2.0499206476 | 5.3578098065  |
| C45 | 0.6491723913  | 4.7863049571  | 2.3834555104  |
| C46 | 0.7431947644  | 5.9651546566  | 1.6200170167  |
| H47 | 0.6490699902  | 5.9004242857  | 0.5391929943  |
| C48 | 0.9506041688  | 7.1895060768  | 2.2496777296  |
| H49 | 1.0231660679  | 8.0935833490  | 1.6494258518  |
| C50 | 1.0663872218  | 7.2599938203  | 3.6386096808  |
| H51 | 1.2261181260  | 8.2185013233  | 4.1258951549  |
| C52 | 0.9751014252  | 6.0918252296  | 4.3989783779  |
| H53 | 1.0652012493  | 6.1393660934  | 5.4815205488  |
| C54 | 0.7690390183  | 4.8609336310  | 3.7837549305  |
| H55 | 0.6948227073  | 3.9473484965  | 4.3672507794  |
| C56 | 0.7186345497  | 3.4399131000  | -1.8123031319 |
| C57 | 1.9254936414  | 3.7924316562  | -2.4346555162 |

|      |               |               |               |
|------|---------------|---------------|---------------|
| H58  | 2.7548577550  | 3.0947597270  | -2.4250511781 |
| C59  | 2.0609881124  | 5.0244860718  | -3.0733444452 |
| H60  | 3.0063202604  | 5.2710094035  | -3.5507718031 |
| C61  | 1.0008456398  | 5.9289233304  | -3.1103043883 |
| H62  | 1.1087808696  | 6.8852122459  | -3.6151072141 |
| C63  | -0.2034768238 | 5.5872032378  | -2.4929222996 |
| H64  | -1.0449730680 | 6.2754811199  | -2.5129490319 |
| C65  | -0.3439107105 | 4.3607841811  | -1.8482428344 |
| H66  | -1.2889628253 | 4.1095520007  | -1.3749971050 |
| C67  | -2.9902567402 | 2.5058245121  | 0.6455141426  |
| C68  | -2.8627514971 | 3.8296224671  | 1.0935170180  |
| H69  | -1.8764007026 | 4.2320602240  | 1.2961121547  |
| C70  | -3.9926545593 | 4.6198649153  | 1.3019284241  |
| H71  | -3.8652547684 | 5.6405359319  | 1.6546581610  |
| C72  | -5.2709152896 | 4.1135557050  | 1.0709336278  |
| H73  | -6.1481109650 | 4.7317385106  | 1.2421074862  |
| C74  | -5.4077939045 | 2.8006042713  | 0.6171758900  |
| H75  | -6.3950464000 | 2.3835907340  | 0.4330563041  |
| C76  | -4.2835951241 | 2.0079780460  | 0.4003004788  |
| H77  | -4.4067179747 | 0.9891556884  | 0.0444977211  |
| C78  | -4.4656403691 | -0.9997955765 | 2.8411297247  |
| C79  | -4.4849715649 | -0.9895904744 | 4.2481797070  |
| H80  | -3.5649857758 | -0.7767431022 | 4.7847517288  |
| C81  | -5.6709280059 | -1.2402526938 | 4.9317452725  |
| H82  | -5.6741011075 | -1.2262212582 | 6.0191425861  |
| C83  | -6.8490916988 | -1.5086640692 | 4.2326342127  |
| H84  | -7.7721834314 | -1.7052520677 | 4.7719189874  |
| C85  | -6.8335154522 | -1.5250623723 | 2.8365242301  |
| H86  | -7.7454604736 | -1.7386119635 | 2.2841042195  |
| C87  | -5.6550323808 | -1.2744380750 | 2.1399791165  |
| H88  | -5.6325031731 | -1.2960176711 | 1.0540967970  |
| Ta89 | -1.2792696352 | 0.9206652122  | -1.5736753355 |
| Ta90 | -0.2060455097 | -1.9833567331 | -0.9806115666 |
| Ta91 | 1.8088255836  | 0.4273567693  | -1.2170053725 |
| N92  | 0.2040941221  | -0.3947175746 | -2.4764755010 |
| N93  | -2.1754757491 | -0.9094017597 | -0.9059241824 |
| N94  | -2.2907007824 | 1.7218594681  | -2.8117794926 |
| N95  | -0.4349557612 | -3.5725637237 | -1.7644629300 |
| N96  | -0.5451980369 | -2.1728011567 | 1.1670576029  |
| N97  | 1.8508676926  | -1.6652733032 | -0.4382430588 |
| N98  | 3.2941999681  | 0.7575413702  | -2.1549412685 |
| C99  | 0.3062871444  | -0.7738951731 | -3.8509594451 |
| C100 | -0.7982117100 | -0.6975878133 | -4.7146509825 |
| H101 | -1.7487380385 | -0.3329557894 | -4.3380206048 |
| C102 | -0.6861467758 | -1.0856675521 | -6.0489282211 |

|      |               |               |               |
|------|---------------|---------------|---------------|
| H103 | -1.5565348238 | -1.0105929950 | -6.6964596374 |
| C104 | 0.5230054332  | -1.5674451770 | -6.5513229655 |
| H105 | 0.6061463528  | -1.8692141749 | -7.5919932134 |
| C106 | 1.6216129163  | -1.6626984342 | -5.6962225772 |
| H107 | 2.5705871049  | -2.0455939134 | -6.0638198440 |
| C108 | 1.5163698765  | -1.2737750666 | -4.3625989213 |
| H109 | 2.3787306584  | -1.3578790516 | -3.7077467258 |
| C110 | -3.3839518773 | -1.5489229644 | -1.3310008455 |
| C111 | -4.3019630879 | -0.9132659800 | -2.1815829369 |
| H112 | -4.0988800787 | 0.0929828892  | -2.5309936314 |
| C113 | -5.4657948124 | -1.5674003389 | -2.5856698607 |
| H114 | -6.1593325682 | -1.0528327128 | -3.2466535929 |
| C115 | -5.7402394683 | -2.8654008537 | -2.1567583228 |
| H116 | -6.6460959722 | -3.3727311947 | -2.4778794453 |
| C117 | -4.8338990441 | -3.5045216495 | -1.3094739761 |
| H118 | -5.0262588954 | -4.5170890200 | -0.9635752055 |
| C119 | -3.6726100149 | -2.8559801355 | -0.8989428824 |
| H120 | -2.9783068384 | -3.3690053734 | -0.2399955124 |
| C121 | -3.0569554648 | 2.3803015742  | -3.7516277150 |
| C122 | -4.2951920193 | 2.9444952228  | -3.3910477652 |
| H123 | -4.6282923767 | 2.8686315786  | -2.3596113537 |
| C124 | -5.0700778343 | 3.5951596980  | -4.3472031878 |
| H125 | -6.0246605740 | 4.0275181075  | -4.0564825047 |
| C126 | -4.6311908977 | 3.6947605645  | -5.6685268003 |
| H127 | -5.2411757176 | 4.2031751518  | -6.4107669471 |
| C128 | -3.4021638230 | 3.1391745765  | -6.0298891889 |
| H129 | -3.0510158658 | 3.2145534868  | -7.0562429247 |
| C130 | -2.6168210874 | 2.4863278021  | -5.0845978931 |
| H131 | -1.6605423803 | 2.0499206476  | -5.3578098065 |
| C132 | -0.6491723913 | -4.7863049571 | -2.3834555104 |
| C133 | -0.7431947644 | -5.9651546566 | -1.6200170167 |
| H134 | -0.6490699902 | -5.9004242857 | -0.5391929943 |
| C135 | -0.9506041688 | -7.1895060768 | -2.2496777296 |
| H136 | -1.0231660679 | -8.0935833490 | -1.6494258518 |
| C137 | -1.0663872218 | -7.2599938203 | -3.6386096808 |
| H138 | -1.2261181260 | -8.2185013233 | -4.1258951549 |
| C139 | -0.9751014252 | -6.0918252296 | -4.3989783779 |
| H140 | -1.0652012493 | -6.1393660934 | -5.4815205488 |
| C141 | -0.7690390183 | -4.8609336310 | -3.7837549305 |
| H142 | -0.6948227073 | -3.9473484965 | -4.3672507794 |
| C143 | -0.7186345497 | -3.4399131000 | 1.8123031319  |
| C144 | -1.9254936414 | -3.7924316562 | 2.4346555162  |
| H145 | -2.7548577550 | -3.0947597270 | 2.4250511781  |
| C146 | -2.0609881124 | -5.0244860718 | 3.0733444452  |
| H147 | -3.0063202604 | -5.2710094035 | 3.5507718031  |

|      |               |               |               |
|------|---------------|---------------|---------------|
| C148 | -1.0008456398 | -5.9289233304 | 3.1103043883  |
| H149 | -1.1087808696 | -6.8852122459 | 3.6151072141  |
| C150 | 0.2034768238  | -5.5872032378 | 2.4929222996  |
| H151 | 1.0449730680  | -6.2754811199 | 2.5129490319  |
| C152 | 0.3439107105  | -4.3607841811 | 1.8482428344  |
| H153 | 1.2889628253  | -4.1095520007 | 1.3749971050  |
| C154 | 2.9902567402  | -2.5058245121 | -0.6455141426 |
| C155 | 2.8627514971  | -3.8296224671 | -1.0935170180 |
| H156 | 1.8764007026  | -4.2320602240 | -1.2961121547 |
| C157 | 3.9926545593  | -4.6198649153 | -1.3019284241 |
| H158 | 3.8652547684  | -5.6405359319 | -1.6546581610 |
| C159 | 5.2709152896  | -4.1135557050 | -1.0709336278 |
| H160 | 6.1481109650  | -4.7317385106 | -1.2421074862 |
| C161 | 5.4077939045  | -2.8006042713 | -0.6171758900 |
| H162 | 6.3950464000  | -2.3835907340 | -0.4330563041 |
| C163 | 4.2835951241  | -2.0079780460 | -0.4003004788 |
| H164 | 4.4067179747  | -0.9891556884 | -0.0444977211 |
| C165 | 4.4656403691  | 0.9997955765  | -2.8411297247 |
| C166 | 4.4849715649  | 0.9895904744  | -4.2481797070 |
| H167 | 3.5649857758  | 0.7767431022  | -4.7847517288 |
| C168 | 5.6709280059  | 1.2402526938  | -4.9317452725 |
| H169 | 5.6741011075  | 1.2262212582  | -6.0191425861 |
| C170 | 6.8490916988  | 1.5086640692  | -4.2326342127 |
| H171 | 7.7721834314  | 1.7052520677  | -4.7719189874 |
| C172 | 6.8335154522  | 1.5250623723  | -2.8365242301 |
| H173 | 7.7454604736  | 1.7386119635  | -2.2841042195 |
| C174 | 5.6550323808  | 1.2744380750  | -2.1399791165 |
| H175 | 5.6325031731  | 1.2960176711  | -1.0540967970 |



#### IV. Electrospray Mass Spectra for 3 and 4, Including $^{17}\text{O}$ -, $^{18}\text{O}$ -Enriched Samples

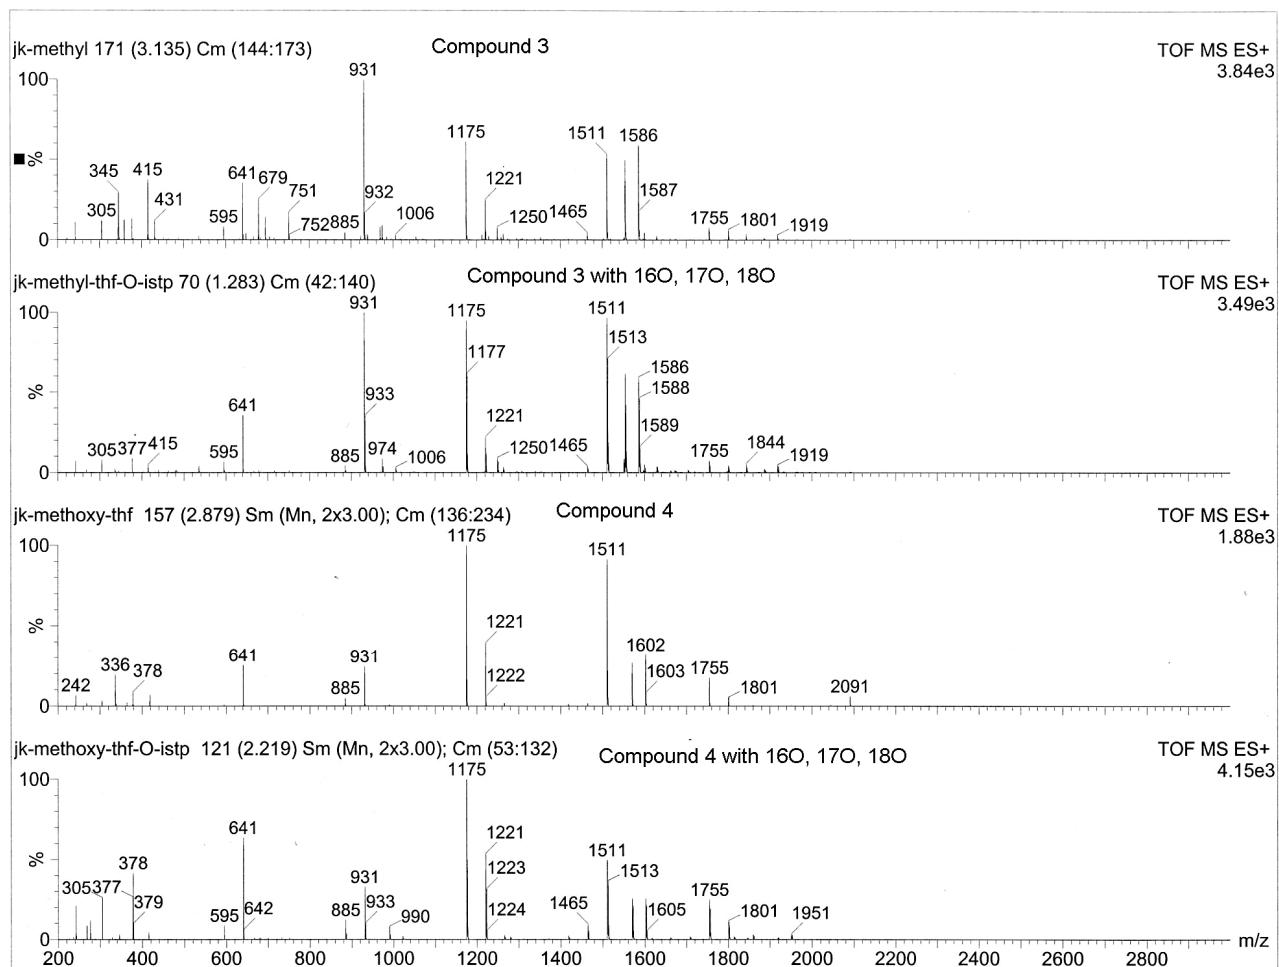

Figure S1. Full spectral width.

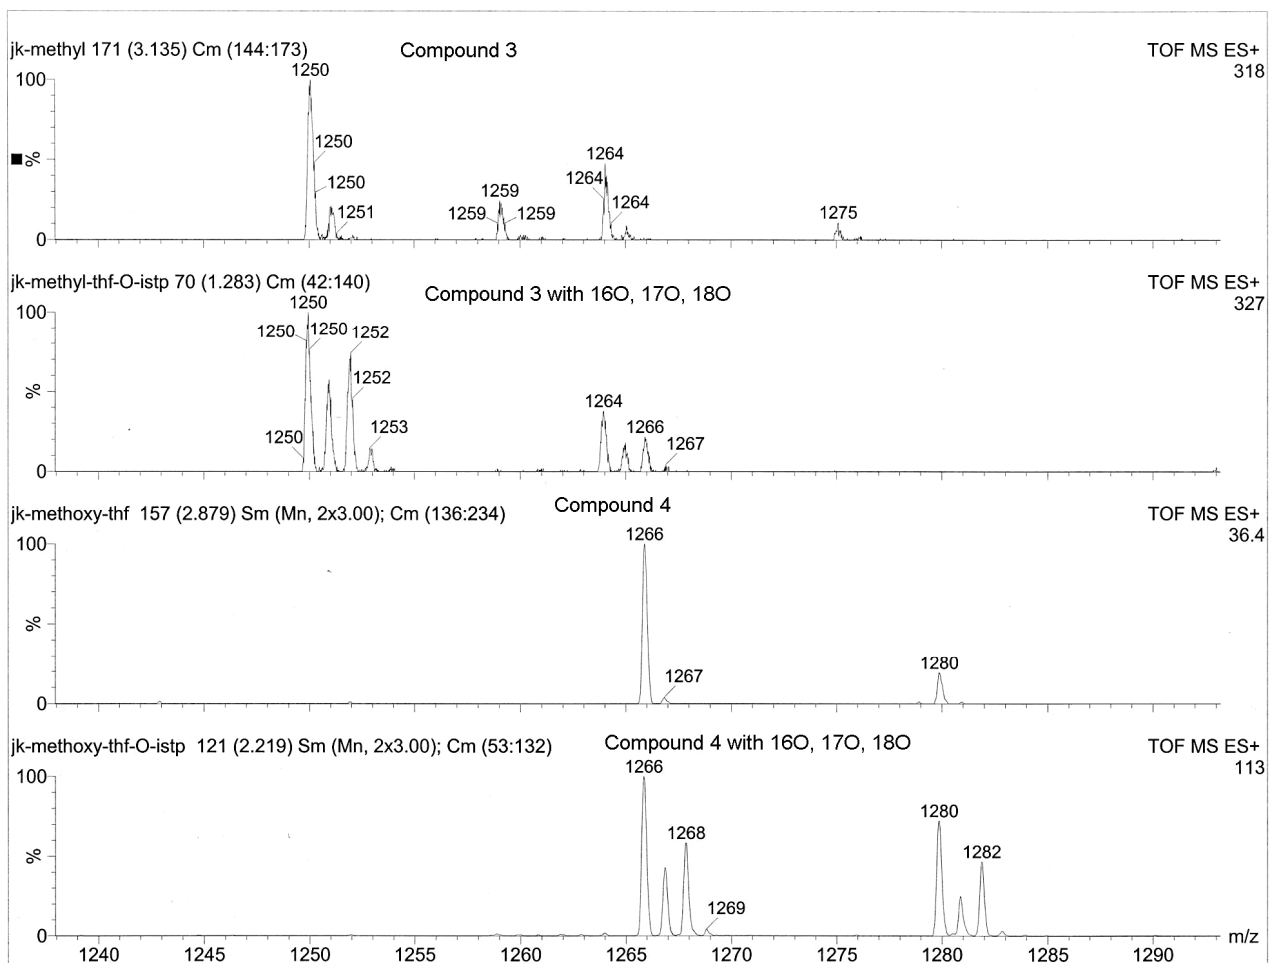

**Figure S2.** Enlargement #1, showing 16 Da shifts of compound **4** peaks relative to those of **3**.

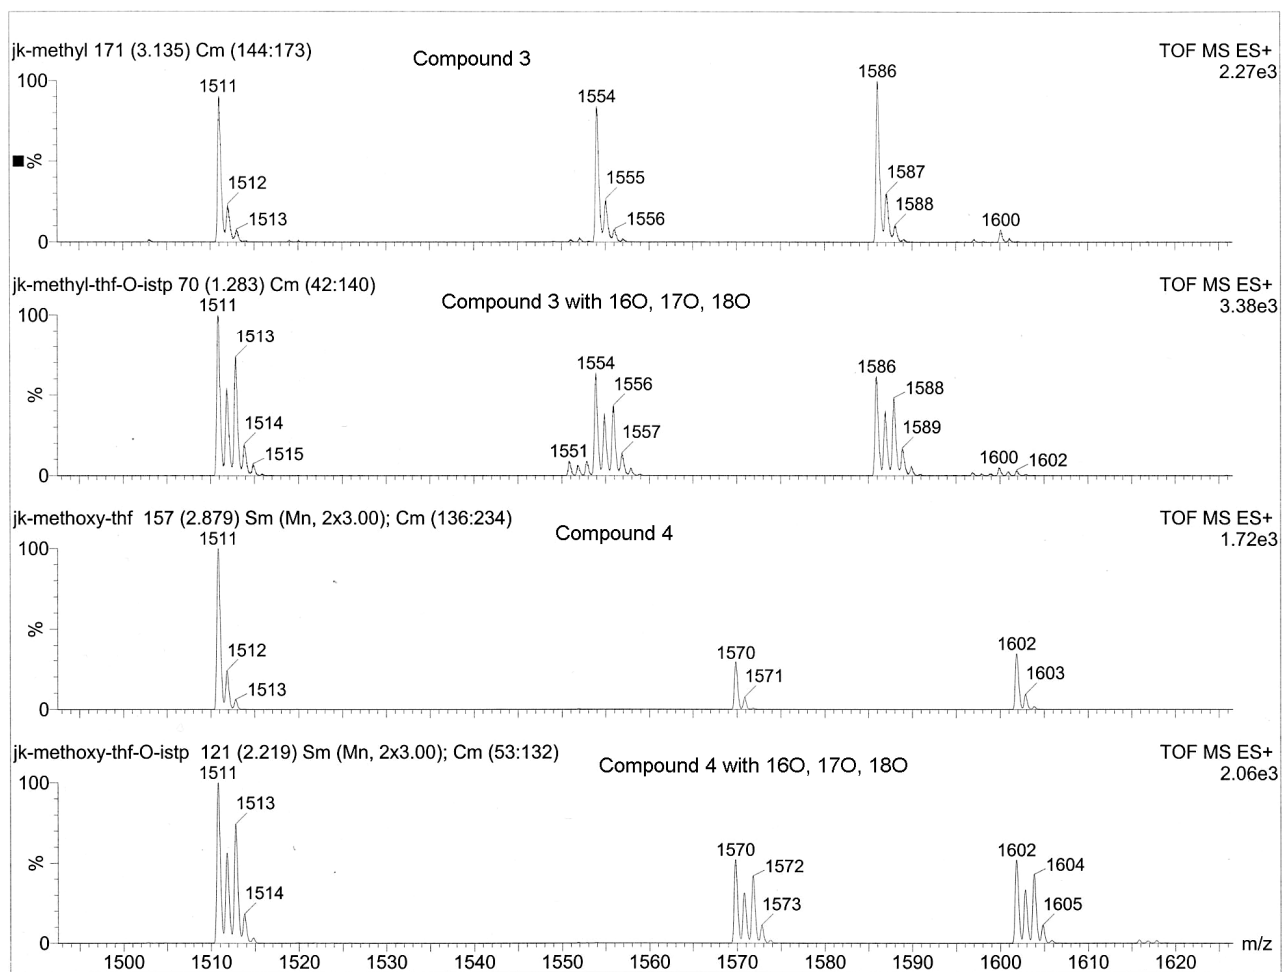

**Figure S3.** Enlargement #2, showing peak that is common to **3** and **4**, no ligands remaining on cluster core.

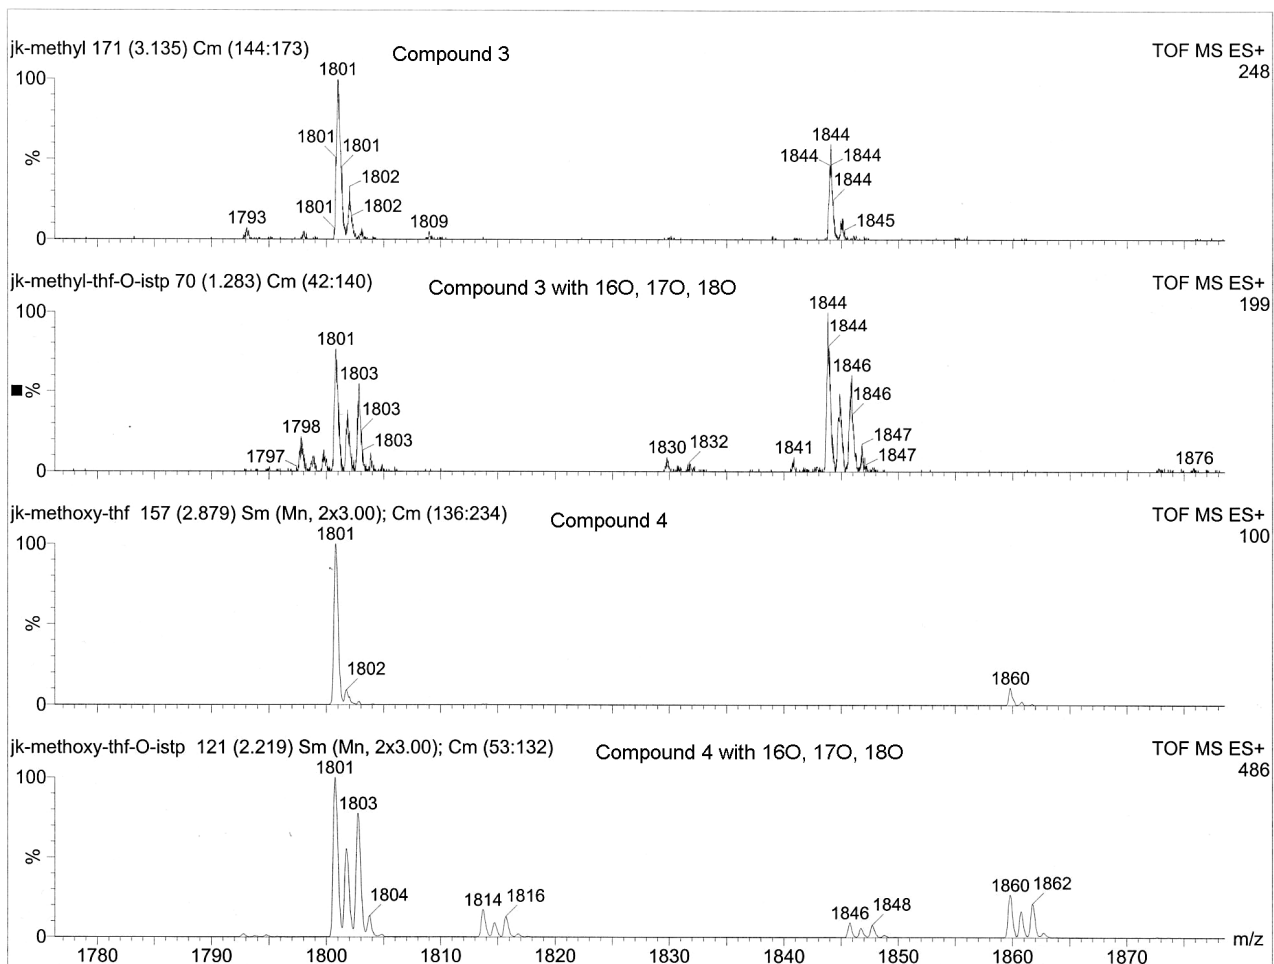

**Figure S4.** Enlargement #3, showing higher-mass peaks.

## V. References

- [1] P. J. Alaimo, D. W. Peters, J. Arnold, R. G. Bergman, *J. Chem. Ed.* **2001**, 78, 64.
- [2] L. L. Anderson, J. Arnold, R. G. Bergman, *Org. Lett.* **2004**, 6, 2519-2522.
- [3] a) Compound **2**: SAINT v.7.23, SAX Area-Detector Integration Program, Siemens Industrial Automation Inc, Madison, WI, **2005** ; b) Compound **5**: SAINT v.7.07B, SAX Area Detector Integration Program, Siemens Industrial Automation Inc, Madison, WI, **2005**.
- [4] XPREP v.6.12, part of the SHELXTL Crystal Structure Determination Package, Bruker AXS, Madison, WI, **1995-1999**.
- [5] SADABS v.2.10, Siemens Area Detector ABSoption Correction Program, Madison, WI, **2005**.
- [6] G. M. Sheldrick, SHELXTL Crystal Structure Determination Package, Bruker AXS, Madison, WI, **1995-1999**.
- [7] L. J. Farrugia, *J. Appl. Cryst.* **1997**, 30, 565.
- [8] POV-ray v.3.5.icl.win32, copyright **1996-2002**.
- [9] Jaguar, v.6.5, Schrodinger, LLC, New York, NY, **2005**.
- [10] Maestro, v.7.5, Schrodinger, LLC, New York, NY, **2005**.
- [11] X. Xu, W. A. Goddard, III, *Proc. Natl. Acad. Sci. USA* **2004**, 101, 2673-2677.
- [12] A. D. Becke, *J. Chem. Phys.* **1993**, 98, 5648-5652.
- [13] B. Miehlich, A. Savin, H. Stoll, H. Preuss, *Chem. Phys. Lett.* **1989**, 157, 200-206.
- [14] J. P. Perdew, J. A. Chevary, S. H. Vosko, K. A. Jackson, M. R. Pederson, D. J. Singh, C. Fiolhais, *Phys. Rev. B* **1992**, 46, 6671-6687.
- [15] P. J. Stephens, F. J. Devlin, C. F. Chabalowski, M. J. Frisch, *J. Phys. Chem.* **1994**, 98, 11623-11627.

- [16] P. J. Hay, W. R. Wadt, *J. Chem. Phys.* **1985**, 82, 299-310.
- [17] a) R. Ditchfield, W. J. Hehre, J. A. Pople, *J. Chem. Phys.* **1971**, 54, 724-728 ; b) W. J. Hehre, R. Ditchfield, J. A. Pople, *J. Chem. Phys.* **1972**, 56, 2257-2261 ; c) P. C. Hariharan, J. A. Pople, *Theor. Chim. Acta* **1973**, 28, 213-222 ; d) M. M. Francl, W. J. Pietro, W. J. Hehre, J. S. Binkley, M. S. Gordon, D. J. DeFrees, J. A. Pople, *J. Chem. Phys.* **1982**, 77, 3654-3665.
